# Supplementary material
Source: publisher figshare collection journal article supplement (https://karger.figshare.com/ndownloader/files/35916203)
Supplement: Supplementary file 1 [file 35916203]

**Supplement Table 2.** Associations between the thickness of retinal nerve fiber layer by each ETDRS sector with gender, age (per decade), and axial length

| **ETDRS Sector** | **Male vs female** | | | **Age (per decade), year** | | | **Axial length, (mm)** | | |
| --- | --- | --- | --- | --- | --- | --- | --- | --- | --- |
| Coefficient | 95% CI | P Value | Coefficient | 95% CI | P Value | Coefficient | 95% CI | P Value |
| **Central area** | 0.78 | 0.29,  1.26 | 0.002 | -0.06 | -0.21,  0.09 | 0.397 | 0.50 | 0.20,  0.80 | 0.001 |
| **Inner ring** | |  |  |  |  |  |  |  |  |
| Inner superior | 0.15 | -0.32,  0.62 | 0.522 | -0.02 | -0.12,  0.17 | 0.770 | 0.44 | 0.15,  0.73 | 0.003 |
| Inner nasal | 0.50 | 0.06,  0.94 | 0.028 | 0.01 | -0.12,  0.15 | 0.847 | 0.63 | 0.36,  0.90 | <0.001 |
| Inner inferior | 0.62 | 0.08,  1.16 | 0.026 | -0.04 | -0.21,  0.12 | 0.600 | 0.65 | 0.32,  0.99 | <0.001 |
| Inner temporal | 0.09 | -0.16,  0.35 | 0.475 | 0.19 | 0.11,  0.26 | <0.001 | 0.06 | -0.09,  0.22 | 0.425 |
| **Outer ring** | |  |  |  |  |  |  |  |  |
| Outer superior | -0.84 | -1.54,  -0.14 | 0.019 | 0.25 | 0.04,  0.47 | 0.023 | 0.44 | 0.01,  0.87 | 0.044 |
| Outer nasal | -0.26 | -1.30,  0.77 | 0.619 | 0.20 | -0.12,  0.52 | 0.223 | 1.40 | 0.76,  2.03 | <0.001 |
| Outer inferior | -0.42 | -1.26,  0.43 | 0.332 | -0.05 | -0.32,  0.21 | 0.682 | 0.53 | 0.01,  1.05 | 0.046 |
| Outer temporal | 0.02 | -0.29,  0.32 | 0.920 | 0.36 | 0.27,  0.46 | <0.001 | 0.21 | 0.02,  0.40 | 0.030 |
| *Note: CI = confidence interval, mm = millimeter* | | | | | | | | | |
